# Supplementary material for: FTO Alleviates CdCl2-Induced Apoptosis and Oxidative Stress via the AKT/Nrf2 Pathway in Bovine Granulosa Cells
Source: MDPI journal article supplement (doi:10.3390/ijms23094948), 2022-04-29
Supplement: s1 [file s1]

Table S1  
siRNA sequences.

| siRNA            | Sequence(5'→3')                                                  |
|------------------|------------------------------------------------------------------|
| Negative control | sense: UUCUCCGAACGUGUCACGUTT<br>antisense: ACGUGACACGUUCGGAGAATT |
| MNT siRNA        | sense: GGUGGGCCAGACAGUGCUUTT<br>antisense: AAGCACUGUCUGGCCCACCTT |
| YTHDF2 siRNA     | sense: GCAGUGGGUUCGGUCAUAATT<br>antisense: UUAUGACCGAACCCACUGCTT |

Table S2  
Primer sequences for real-time qPCR.

| Gene             | Primer Sequence (5'-3')                                 | Annealing temp.(°C) | Size (bp) | Genebank No.   |
|------------------|---------------------------------------------------------|---------------------|-----------|----------------|
| <i>β-actin</i>   | F: TTGATCTTCATTGTGCTGGGTG<br>R: CTCCTGGGCATGGAATCCT     | 54-64               | 189       | NM_173979.3    |
| <i>Bax</i>       | F: CGAGTTGATCAGGACCATCAT<br>R: ATGTGGGTGTCCCAAAGTAG     | 54                  | 168       | XM_015458140.2 |
| <i>Bcl2</i>      | F: TGGATGACCGAGTACCTGAA<br>R: GAGACAGCCAGGAGAAATCAAA    | 54                  | 124       | NM_001166486.1 |
| <i>Caspase-3</i> | F: TGGCGAAATGCAAAGAACGG<br>R: TGTGAGCGTGCTTTTTCAGC      | 56                  | 70        | NM_001077840.1 |
| YTHDF2           | F: GGCAGTGGGTTCGGTCATAA<br>R: ACCGAAGCTTCTCCAAGACG      | 58                  | 109       | NM_001076253.1 |
| ALKBH5           | F: TGTCTTCCAGGCCTAGTGT<br>R: CCCTTCCTAGGGGGATGACA       | 60                  | 182       | NM_001205517.3 |
| FTO              | F: CTGCCAGCGTGCCTGAGTTG<br>R: GTACCGTGAAGAGCCTGGTGTTC   | 63                  | 189       | NM_001098142.1 |
| METTL3           | F: AGCAGGACTCCACCACAGCAG<br>R: CTTGGTTGGCTCCTTGGCTACTTC | 63                  | 92        | NM_001102238.2 |
| METTL14          | F: TGCCCCGAATTCCTATTTGACTGG<br>R: CACCTCTTCCGCCTCCTCTGG | 63                  | 122       | NM_001083714.1 |
| SOD              | F: AGAGGCATGTTGGAGACCTG<br>R: CAGCGTTGCCAGTCTTTGTA      | 57                  | 189       | NM_174615.2    |
| CAT              | F: TGGGACCCAACATCTCCAG<br>R: AAGTGGGTCCTGTGTTCCAG       | 57                  | 178       | NM_001035386.2 |
| Nrf2             | F: CCCAGTCTTCACTGCTCCTC<br>R: TCAGCCAGCTTGTCATTTTG      | 56                  | 165       | NM_001011678.2 |
| NQO1             | F: AACCAACAGACCAGCCAATCAGC<br>R: AGCCTCTATGGCAGCCTCCTTC | 62                  | 124       | NM_001034535.1 |
| BMP4             | F: AGAGGGGCTGGAAGAAAAACAG<br>R: GCTCTGGATGGCACTACGG     | 58                  | 93        | NM_001045877.1 |
| MNT              | F: GGCTGTTTCATGCTCCAAGACA                               | 58                  | 121       | NM_001206899.2 |

|         |                                                                                |    |     |                |
|---------|--------------------------------------------------------------------------------|----|-----|----------------|
| VASH1   | R: GCAGCTCCGTCTCGGGTTT<br>F: CAGGGAGCTGCAGTACAATCA<br>R: AAATTCCCAGGATCACCGCTT | 58 | 146 | NM_001206803.1 |
| TRIM14  | F: GCTGAGAAGCTCAAGGCTCAT<br>R: ATTTGCTCTGTGTATGCCTGC                           | 58 | 155 | XM_024996224.1 |
| VCAN    | F: GCTTCCCTACCCCTGATAGC<br>R: GTGGGTGAGACAGTTTCTGC                             | 58 | 112 | NM_181035.2    |
| GALNT16 | F: CTGCCACCTCCACCTCTGTCTC<br>R: TCCTCCATCTCTGCCTGCCTTC                         | 61 | 84  | NM_001101127.1 |
| WNT5A   | F: TTCTCTCCTTCGCCCAGGTT<br>R: AGAGAGGCTGCGCTCCTATG                             | 59 | 108 | NM_001205971.1 |

Table S3

The information of antibodies used for Western Blot.

| Antibodies           | Cat NO.    | Source                         | Dilution  |
|----------------------|------------|--------------------------------|-----------|
| Nrf2                 | AF0639     | Affinity,Changchun, China      | 1: 1 000  |
| Cleaved-caspase 3    | 341034     | ZENBIO, Chengdu, China         | 1: 1 000  |
| AKT                  | R23412     | ZENBIO, Chengdu, China         | 1: 1 000  |
| P-AKT                | R22961     | ZENBIO, Chengdu, China         | 1: 1 000  |
| FTO                  | R24361     | ZENBIO, Chengdu, China         | 1: 1 000  |
| Bcl2                 | BF9103     | Affinity,Changchun, China      | 1: 1 000  |
| Bax                  | 50599-2-Ig | ProteinTech, Chicago, IL, USA  | 1: 2 000  |
| MNT                  | DF4676     | Affinity,Changchun, China      | 1: 1 000  |
| $\beta$ -actin       | 60008-1-Ig | ProteinTech, Rosemont, IL, USA | 1: 1 0000 |
| Goat Anti-Rabbit IgG | SA00001-2  | ProteinTech, Rosemont, IL, USA | 1: 1 0000 |
| Goat Anti-mouse IgG  | SA00001-1  | ProteinTech, Rosemont, IL, USA | 1: 1 0000 |

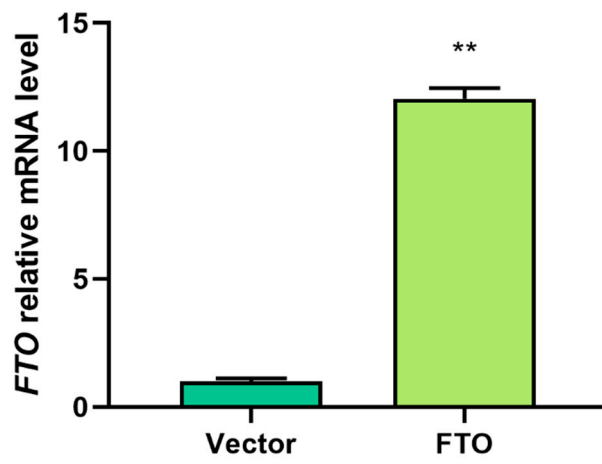

Fig. S1. Analysis of FTO expression levels after transfection pcDNA3.1-FTO or pcDNA3.1-Vector

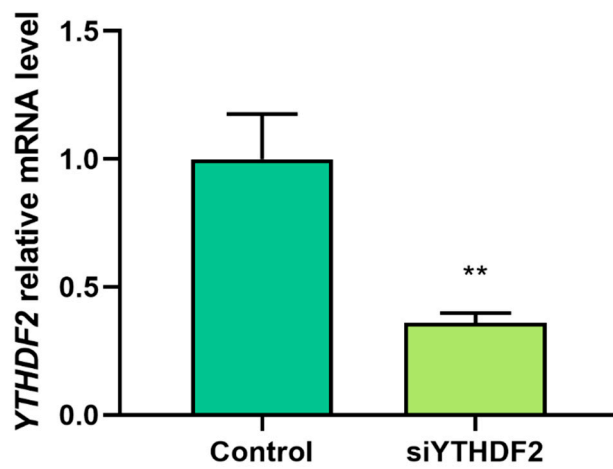

Fig. S2. Analysis of YTHDF2 expression levels after transfection siYTHDF2.

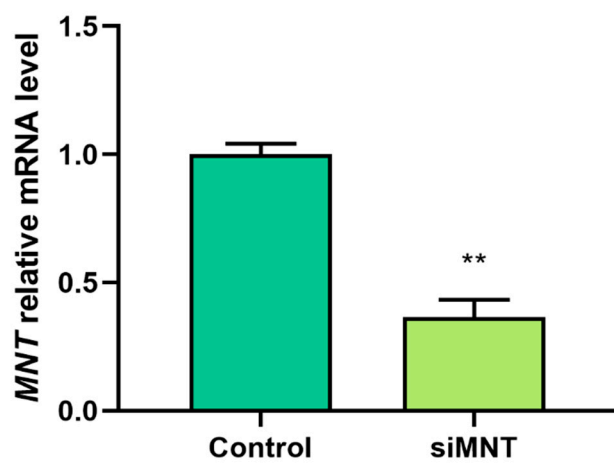

Fig. S3. Analysis of MNT expression levels after transfection siMNT.
